# Supplementary material for: Focusing on the Unfolded Protein Response and Autophagy Related Pathways to Reposition Common Approved Drugs against COVID-19
Source: Preprints.org preprint supplement (doi:10.20944/preprints202003.0302.v1), 2020-03-20
Supplement: Supplementary file 2 [file tableS1_pharnext_repurposing_covid19_mar_2020.xlsx]

## Sheet: Sheet1
ABCB1
ACE
ACE2
ACE2
ACSM3
ADAM17
AKT1
ALKBH1
ALOX5
AMH
ANPEP
ANPEP
ANXA2
APLN
ARIH1
ATP6AP2
AVP
BAG3
BATF2
BRAP
BST2
CALCA
CALR
CANX
CAPN2
CASP1
CASP3
CASP3
CASP8
CASP8
CASP9
CAST
CCL2
CCL3
CCL4
CCL5
CCR5
CCR7
CD14
CD163
CD19
CD209
CD244
CD274
CD276
CD28
CD34
CD4
CD40
CD44
CD5
CD55
CD63
CD68
CD80
CD83
CD86
CDCA7L
CDKN1A
CDKN2A
CFB
CHRNA1
CHRNB1
CHRND
CHRNE
CHRNG
CKLF
CLEC4M
CPE
CR1
CREBBP
CRP
CSF1R
CSF2
CSF3
CTSB
CTSL
CXCL10
CXCL11
CXCL8
CXCL9
CXCR3
CYP2C9
DDIT3
DDX1
DDX5
DDX58
DEDD
DHRS2
DNM1L
DNTT
DPP4
DROSHA
EGFLAM
EGFR
EIF2AK2
EIF2S1
EIF4E
ELF3
ENO3
EPHB2
ERBB2
ESR1
EZR
F2
F3
FAM168B
FCER2
FGL2
FN1
FURIN
GAPDH
GDAP2
GH1
GNL1
GPC3
GSK3B
GUK1
GZMA
HCFC1
HLA-A
HLA-B
HLA-DRB1
HMGB1
HNF1A
HPGDS
HSP90B1
HSPA5
HSPB1
HSPB3
ICAM3
IDO1
IFI44
IFIH1
IFITM1
IFITM3
IFNA2
IFNA5
IFNAR1
IFNAR2
IFNB1
IFNB1
IFNG
IK
IKBKE
IL10
IL12RB1
IL13
IL15
IL18
IL1B
IL2
IL3
IL4
IL5
IL6
IL7R
IRF3
ISG15
ISG20
ITM2B
JAK2
JUN
KRT18
LCN2
LRCH1
LTF
MAPK3
MAVS
MBL2
MMP10
MMP3
MOGAT1
MPEG1
MPP5
MRS2
MS4A1
MTA2
MYOM2
NLRP3
NMI
NNT
NPC1
NPIPA1
NPIPB3
NPS
NPTX1
PAEP
PCNA
PCYT1B
PDE3A
PDE3B
PF4
PI3
PI4KB
PIAS1
PLA2G1B
PLA2G2D
PLAT
PLEC
PLIN2
PLP1
PLP2
PNMA2
PPIA
PRH1
PRH2
PRL
PSMG1
PTGS2
PTPRC
RAPGEF3
RASSF7
RB1
RBM45
REN
RNASEL
RNPC3
RPL3
S100A9
SAA1
SARS1
SARS1
SARS2
SELP
SERPINE1
SFTPD
SLC17A5
SLC4A1
SLC4A3
SLCO6A1
SMAD3
SMAD4
SOAT1
SOCS3
SP2
ST13
STAT1
STAT3
STING1
TBK1
TCN1
TFPI
TGM3
THBD
THBS1
THPO
TICAM1
TLR3
TLR4
TMPRSS11D
TMPRSS11E
TMPRSS2
TMPRSS2
TNF
TNFRSF1A
TNFSF11
TNNC1
TNNI3
TNNT2
TPO
TRAF3
TRAF6
TRIM25
TTR
UCHL3
UGCG
USF2
USF2
USP14
USP5
USP7
VCAM1
ZUP1
