# Supplementary material for: Focusing on the Unfolded Protein Response and Autophagy Related Pathways to Reposition Common Approved Drugs against COVID-19
Source: Preprints.org preprint supplement (doi:10.20944/preprints202003.0302.v1), 2020-03-20
Supplement: Supplementary file 4 [file tableS3_pharnext_repurposing_covi19_mar_2020.xlsx]

## Sheet: Feuil1
DRUG *	UPR/autophagy modulator	REFERENCE
Mefloquine	yes	3
Amodiaquine	yes	4
E-64-D	yes	5
Gemcitabine	yes	6
Toremifene	yes	7
Terconazole	no data	-
Homoharringtonine (Omacetaxine)	yes	8
Benztropine	no data	-
Fluspirilene	yes	9
Thiothixene	no data	-
Promethazine	yes	10
Astemizole	yes	11, 12
Chlorphenoxamine	no data	-
Thiethylperazine	no data	-
Triflupromazine	yes	13
Imatinib	yes	14, 15
Dasatinib	yes	16
Miltefosine	yes	17
Nilotinib	yes	18
Sorafenib	yes	19
Triethylperazine	no data	-
Mizoribine	no data	-
Emetine	yes	20
* - This list of drugs experimentally effective against coronaviruses was pooled from Dyall J et al. Repurposing of clinically developed drugs for treatment of Middle East respiratory syndrome coronavirus infection. Antimicrob Agents Chemother. 2014 Aug;58(8):4885-93 and from Dyall J et al. Middle East Respiratory Syndrome and Severe Acute Respiratory Syndrome: Current Therapeutic Options and Pot…
